# Supplementary material
Source: publisher figshare collection journal article supplement (https://springernature.figshare.com/ndownloader/files/24128735)
Supplement: Supplementary file [file 24128735]

## Additional file 1: Overview of codes

A table showing overarching themes, subthemes and codes used in analysis

Table 2: Overview of codes

| Themes                                       | Subthemes          | Codes                       |
|----------------------------------------------|--------------------|-----------------------------|
| <i>Context</i>                               | CYHC-system        | Organisations               |
|                                              |                    | Actors                      |
|                                              |                    | Hierarchies                 |
|                                              |                    | Interests                   |
|                                              |                    |                             |
|                                              | CYHC-practitioners | Education                   |
|                                              |                    | Team                        |
|                                              |                    | Daily work                  |
|                                              |                    | Communication               |
|                                              |                    | Types of cases/families     |
|                                              |                    |                             |
|                                              | Child abuse        | Policies                    |
|                                              |                    | Tasks                       |
|                                              |                    | Imaginarities               |
|                                              |                    | Decision-making/choices     |
|                                              |                    | Examples                    |
|                                              |                    | Fears of CYHC-practitioners |
|                                              |                    | Fears of families           |
|                                              |                    |                             |
| <i>Definitions and recognition intuition</i> | Words used         | Synonyms                    |
|                                              |                    | Translations                |
|                                              |                    | Examples                    |
|                                              |                    |                             |
|                                              | Definitions in..   | Practice                    |
|                                              |                    | Education                   |
|                                              |                    | Guidelines                  |
|                                              |                    | Discussions                 |
|                                              |                    |                             |
|                                              | Recognition        | Frequency                   |
|                                              |                    | Types of situations         |
|                                              |                    | Sensations                  |
|                                              |                    |                             |
| <i>Attitudes towards intuition</i>           |                    | Opinions respondent         |
|                                              |                    | Opinions colleagues         |
|                                              |                    | Experiences                 |
|                                              |                    | Risks                       |
|                                              |                    |                             |
|                                              | Guidelines         | Support                     |

|                        |                         |                          |
|------------------------|-------------------------|--------------------------|
|                        |                         | Usefulness               |
|                        |                         | Criticism                |
|                        |                         |                          |
|                        | Intuition versus        | Evidence-based medicine  |
|                        |                         | Subjectivity/Objectivity |
|                        |                         | Facts                    |
|                        |                         |                          |
| <i>Use in practice</i> | When?                   | Experience               |
|                        |                         | Change over time         |
|                        |                         | Triggers                 |
|                        |                         | Colleagues               |
|                        |                         | Examples                 |
|                        |                         |                          |
|                        | Normal/abnormal         | Norms and values         |
|                        |                         | Averages                 |
|                        |                         | Risks                    |
|                        |                         | Changes over time        |
|                        |                         |                          |
|                        | Responding to intuition | Decision-making          |
|                        |                         | Consequences             |
|                        |                         | Advice guidelines        |
|                        |                         | Checking intuition       |
|                        |                         |                          |
|                        | Communication           | Family                   |
|                        |                         | Colleagues               |
|                        |                         | Narratives               |
|                        |                         | Networks of family       |
|                        |                         | Weighing information     |
